# Supplementary material for: Effect of hydroxyl on antioxidant properties of 2,3-dihydro-3,5-dihydroxy-6-methyl-4H-pyran-4-one to scavenge free radicals
Source: Royal Society of Chemistry journal article supplement (doi:10.1039/d1ra06317k), 2021-01-01
Supplement: d1ra06317k1.pdf [file d1ra06317k1.pdf]

Supporting Information

**Hydroxyl effect on antioxidant properties of 2,3-dihydro-3,5-dihydroxy-6-methyl-4*H*-pyran-4-one to Scavenge Free Radicals**

Zhifei Chen,<sup>a</sup> Qiang Liu,<sup>a</sup> Zhiwei Zhao,<sup>a</sup> Bing Bai,<sup>b</sup> Zhitao Sun,<sup>a</sup> Lili Cai,<sup>a</sup> Yufeng Fu,<sup>a</sup>

Yuping Ma,<sup>a</sup> Qingfu Wang,<sup>a,\*</sup> Gaolei Xi<sup>a,\*</sup>

<sup>a</sup> Technology Center, China Tobacco Henan Industrial Co., Ltd., Zhengzhou, Henan, 450016, People's Republic of China

<sup>b</sup> School of Food & Biological Engineering, Zhengzhou University of Light Industry, Zhengzhou, Henan, 450002, People's Republic of China

**Email address:** wqfhust@163.com (Q. F. Wang); xigaoleijida@126.com (G. L. Xi)

**Tel:** +86 371 61291087    **Fax:** +86 371 61291087

**Experimental procedures and analytical data**

|                                    |      |
|------------------------------------|------|
| Contents:                          | page |
| 1. General considerations          | S2   |
| 2. Copies of NMR spectra           | S2   |
| 3. Results of scavenging radicals. | S13  |

## 1. General considerations

All the manipulations of air- and/or moisture-sensitive compounds were carried out under nitrogen atmosphere using the standard Schlenk techniques. The solvents were dried and distilled prior to use by the literature methods.  $^1\text{H}$  and  $^{13}\text{C}\{^1\text{H}\}$  NMR spectra were recorded on a Bruker DRX-600 spectrometer and all chemical shift values refer to  $\delta_{\text{TMS}} = 0.00$  ppm,  $\text{CDCl}_3$  ( $\delta(^1\text{H})$ , 7.26 ppm;  $\delta(^{13}\text{C})$ , 77.16 ppm). TLC analysis was performed by using glass-backed plates coated with 0.2 mm silica gel. Flash column chromatography was performed on silica gel (200-300 meshes). All chemical reagents were purchased from commercial sources and used as received unless otherwise indicated.

## 2. Copies of NMR spectra

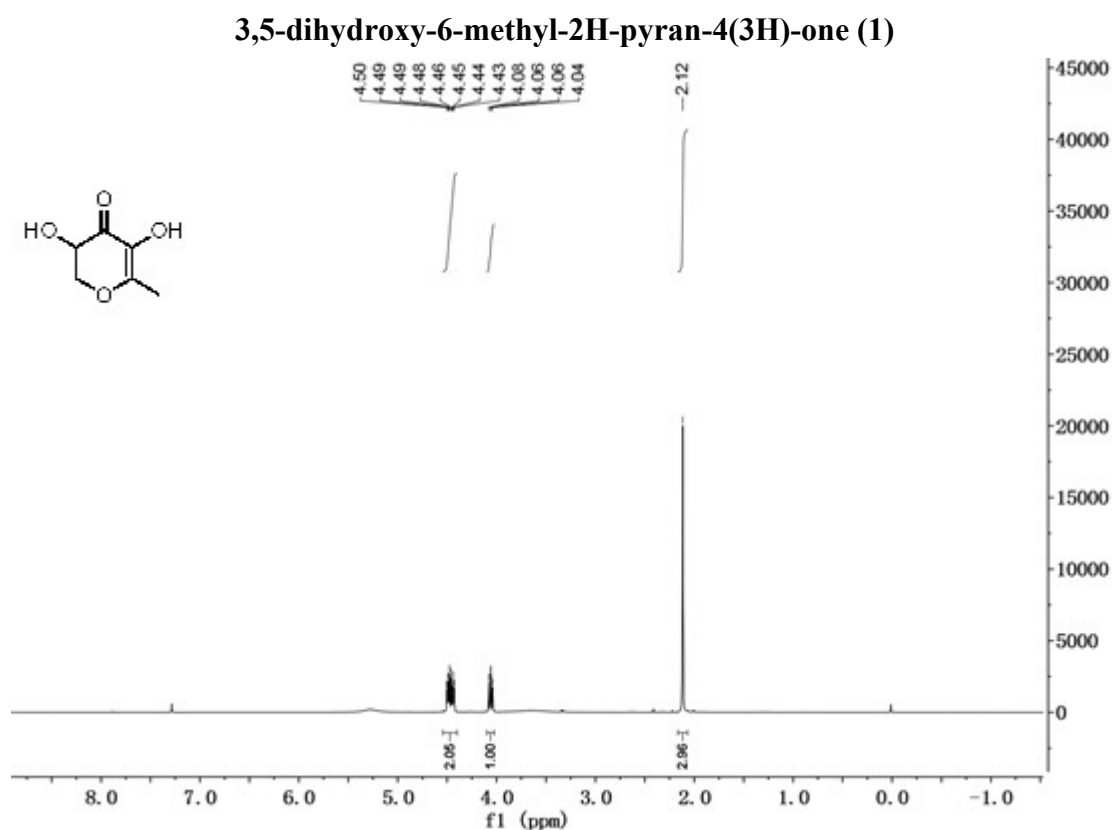

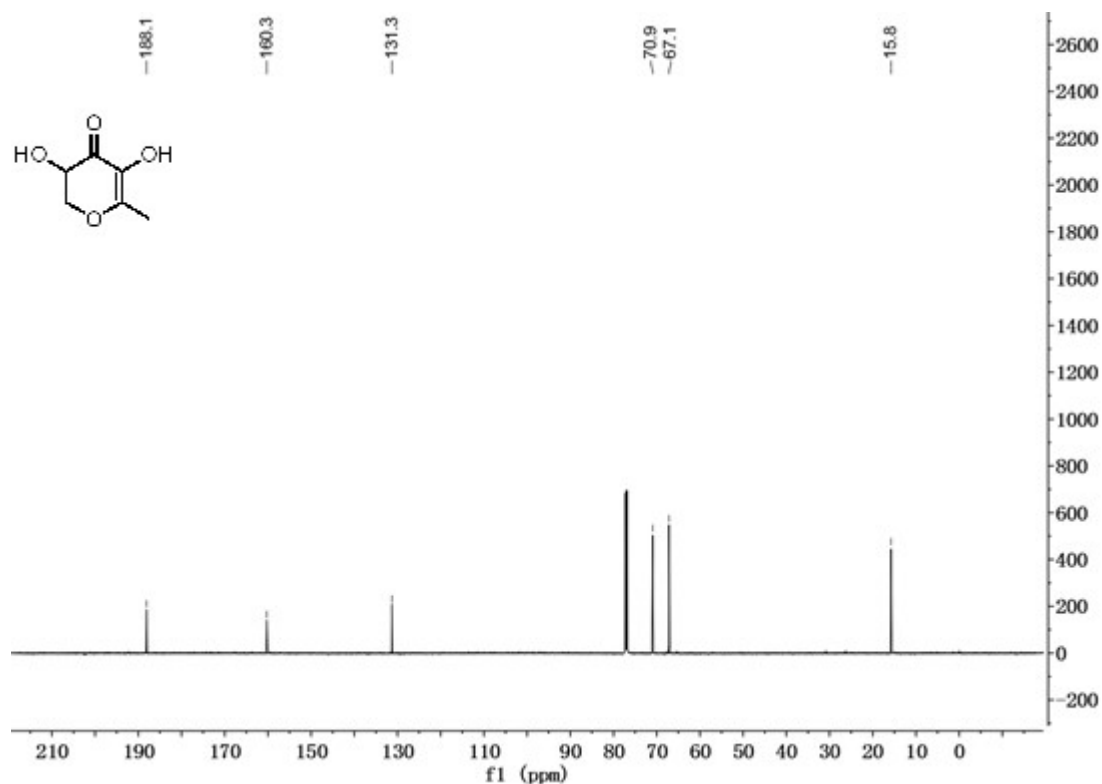

### 3-hydroxy-6-methyl-4-oxo-3,4-dihydro-2H-pyran-5-yl acetate (2a)

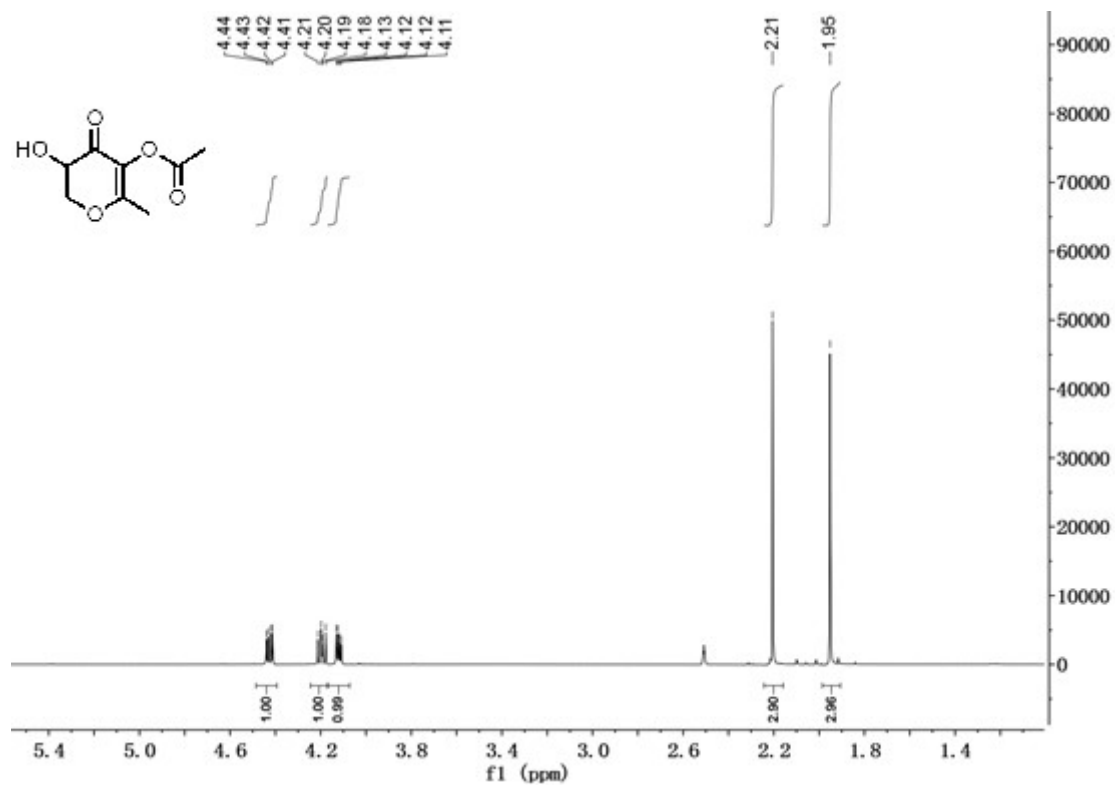

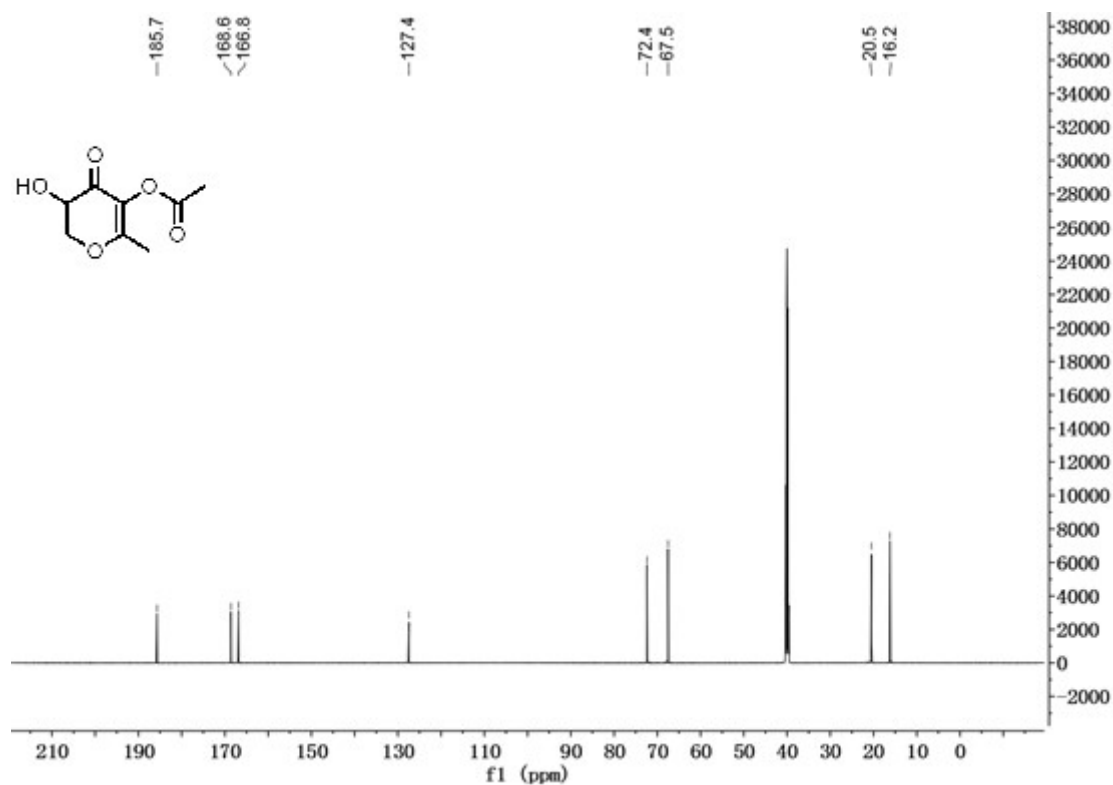

3-hydroxy-6-methyl-4-oxo-3,4-dihydro-2H-pyran-5-yl benzoate (2b)

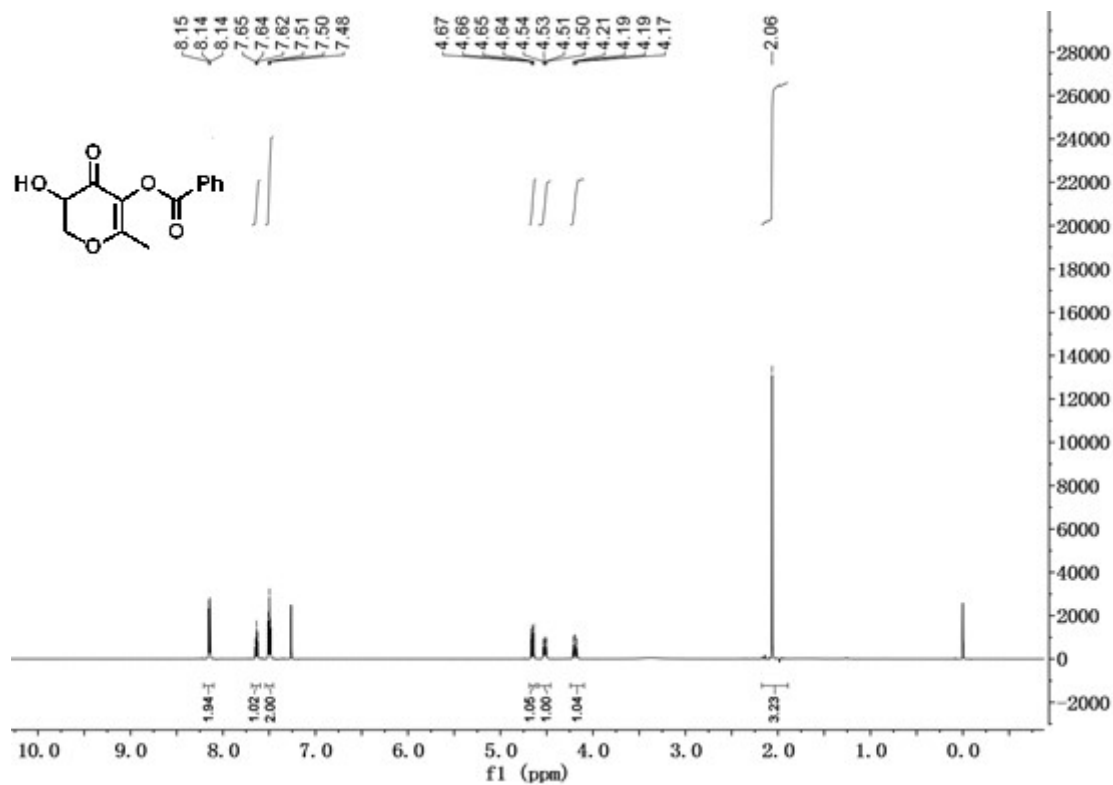

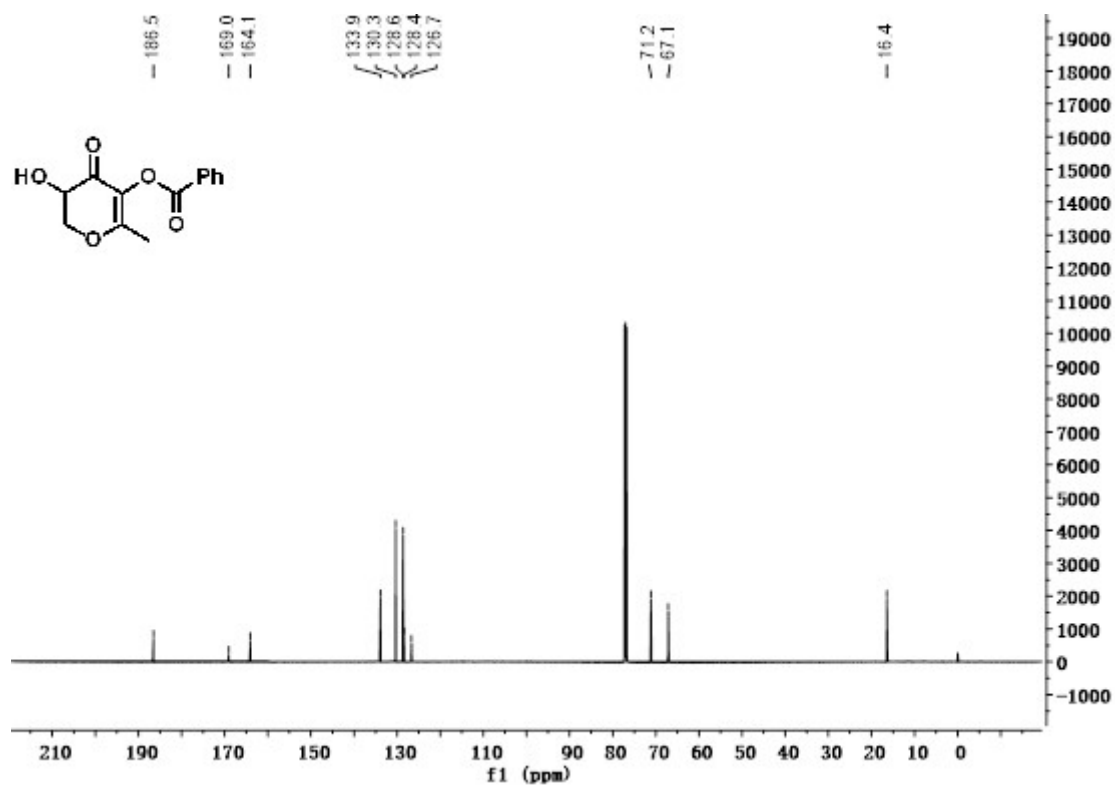

3-hydroxy-6-methyl-4-oxo-3,4-dihydro-2H-pyran-5-yl 3-methylbutanoate (2c)

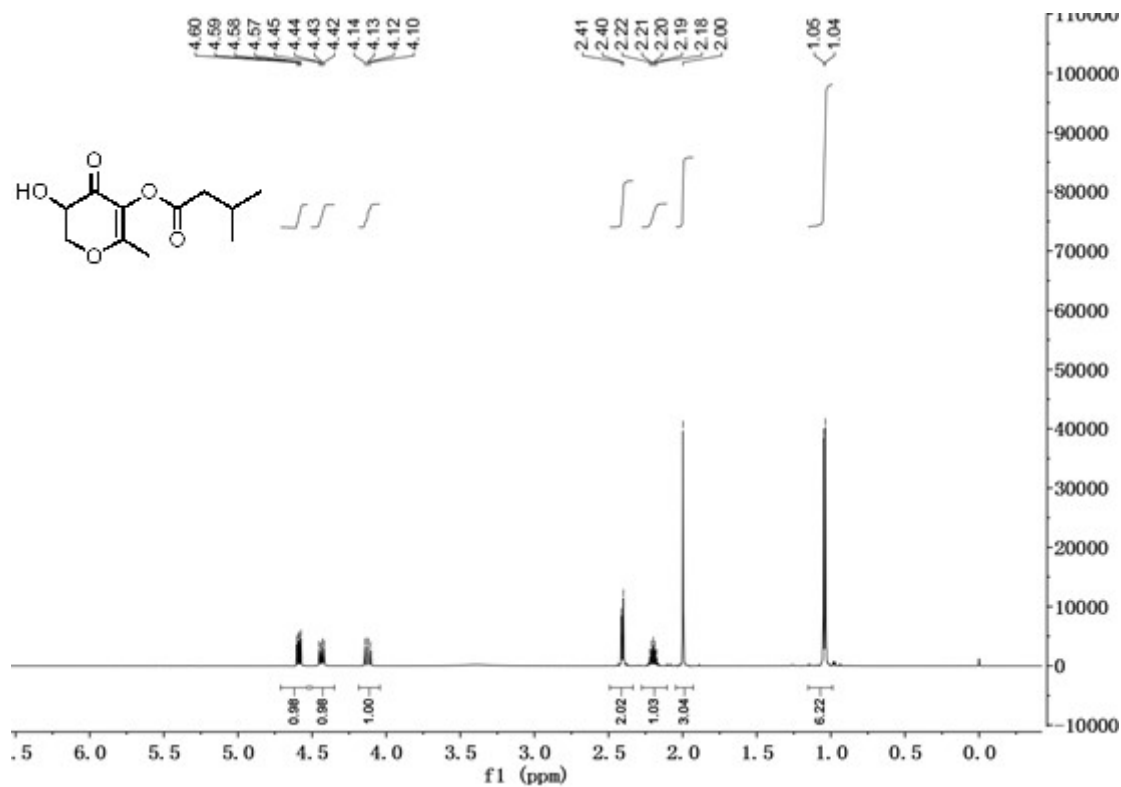

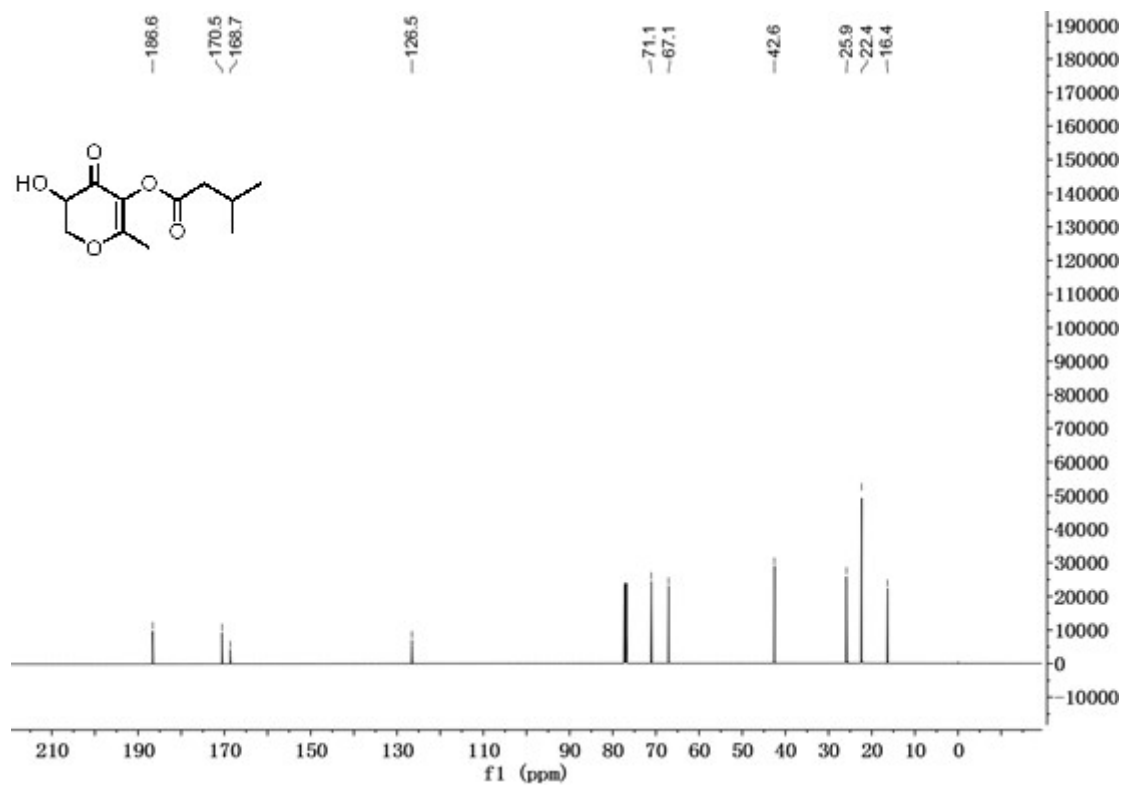

3-hydroxy-6-methyl-4-oxo-3,4-dihydro-2H-pyran-5-yl palmitate (2d)

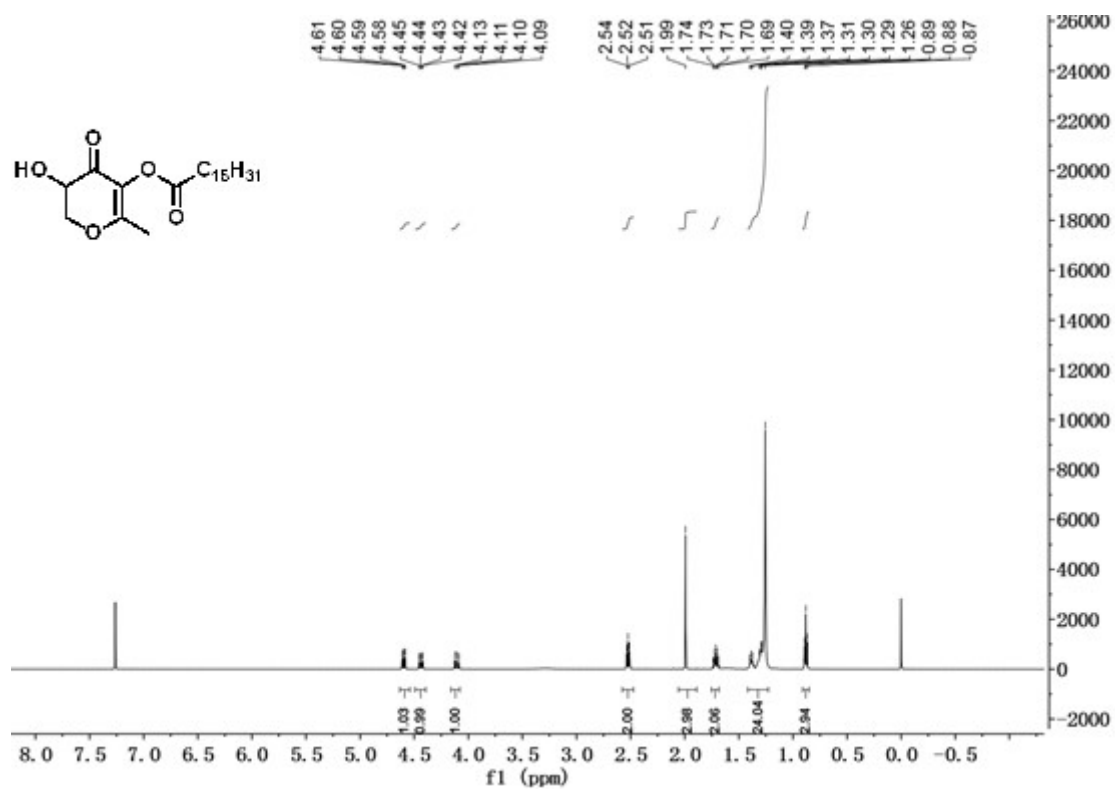

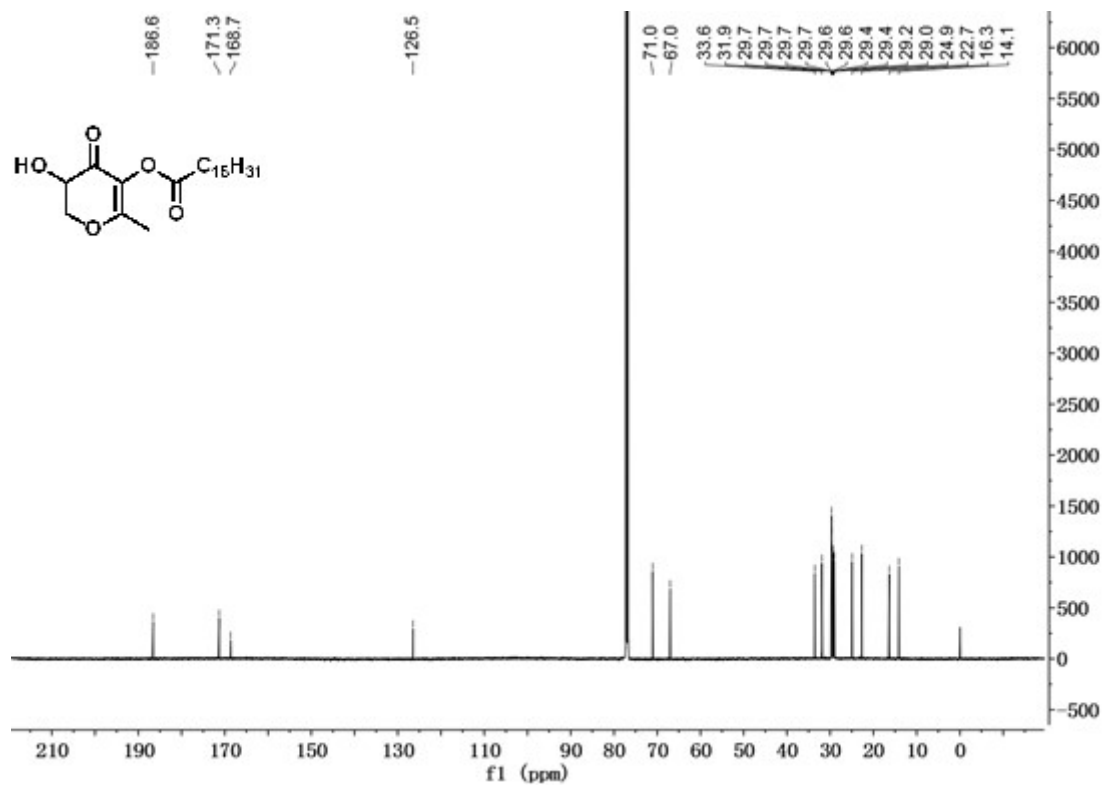

tert-butyl (3-hydroxy-6-methyl-4-oxo-3,4-dihydro-2H-pyran-5-yl) carbonate (3)

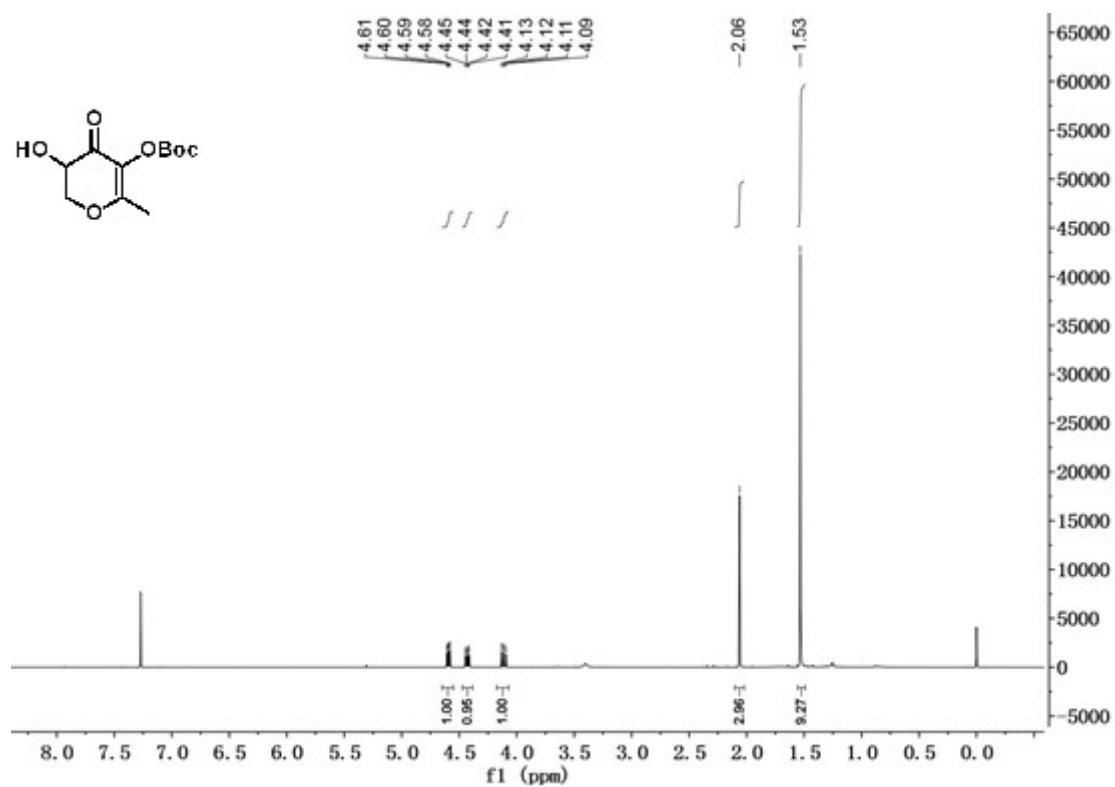

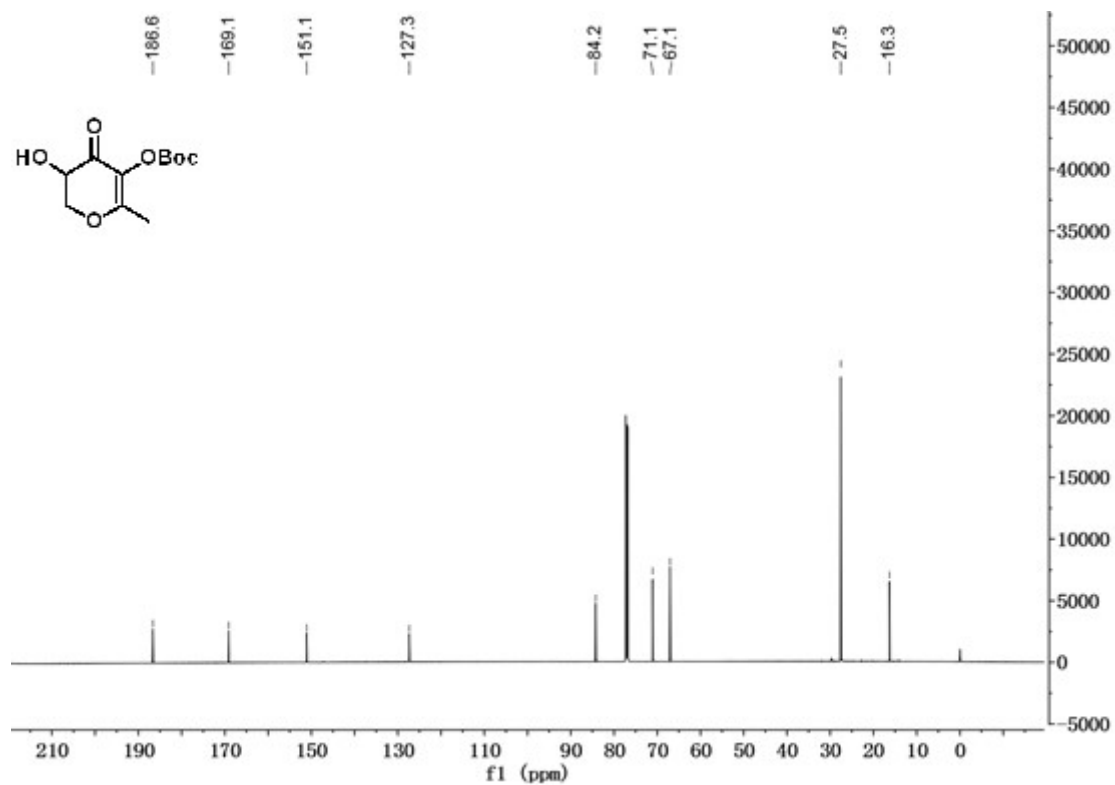

5-((tert-butoxycarbonyl)oxy)-6-methyl-4-oxo-3,4-dihydro-2H-pyran-3-yl acetate (4a)

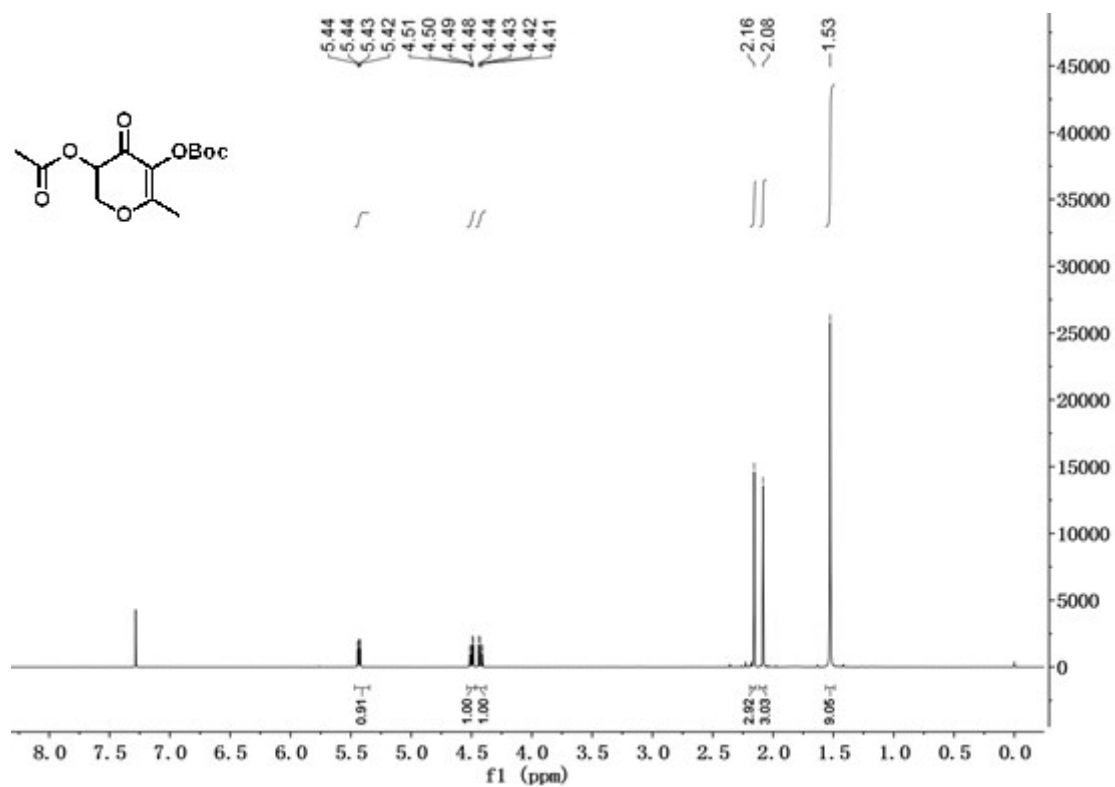



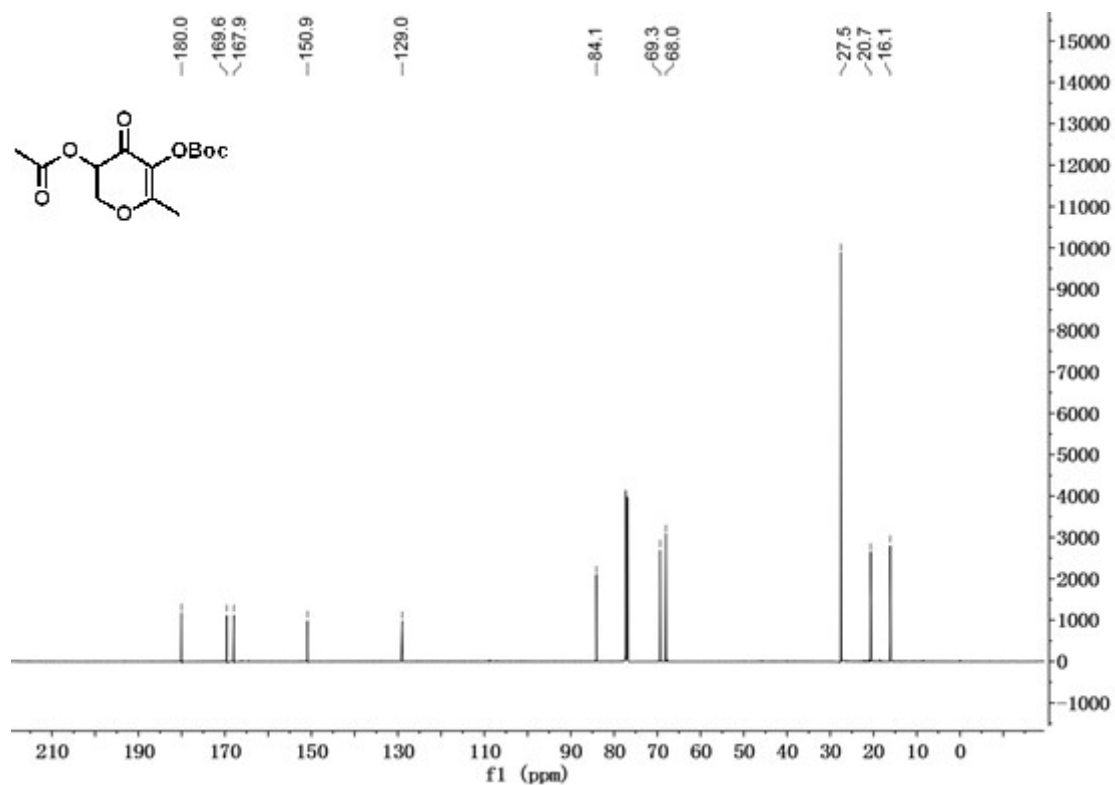

5-((tert-butoxycarbonyl)oxy)-6-methyl-4-oxo-3,4-dihydro-2H-pyran-3-yl benzoate (4b)

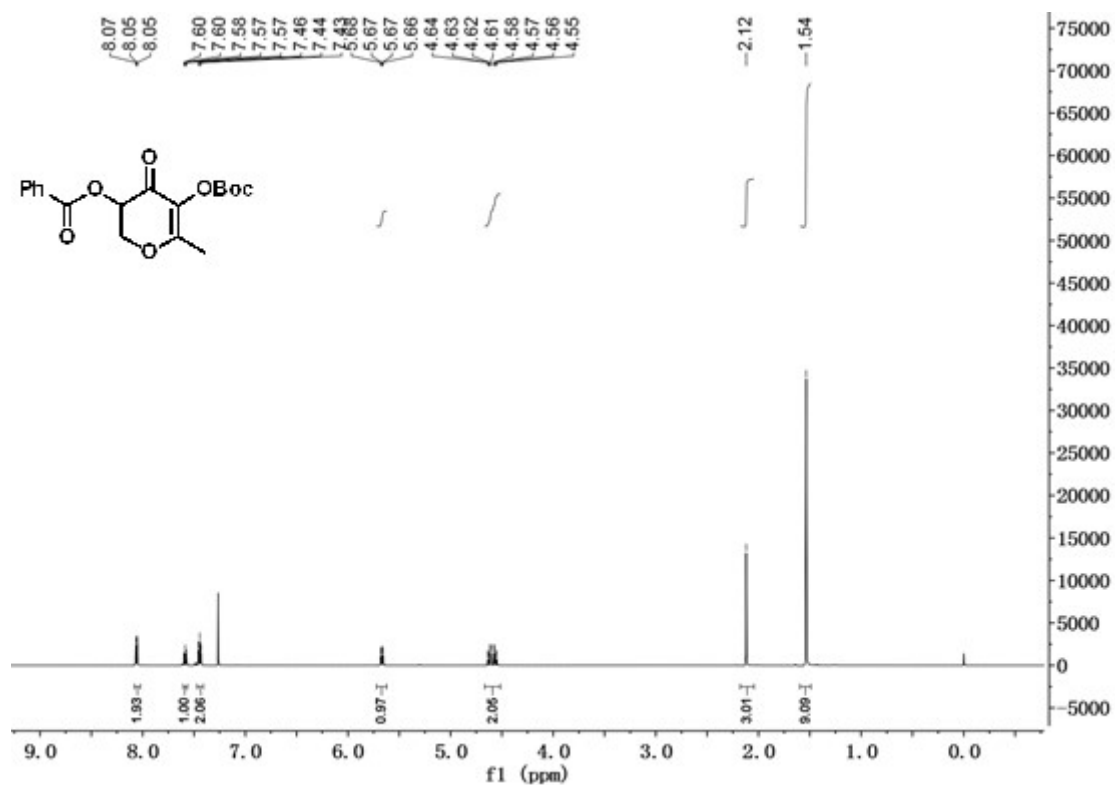

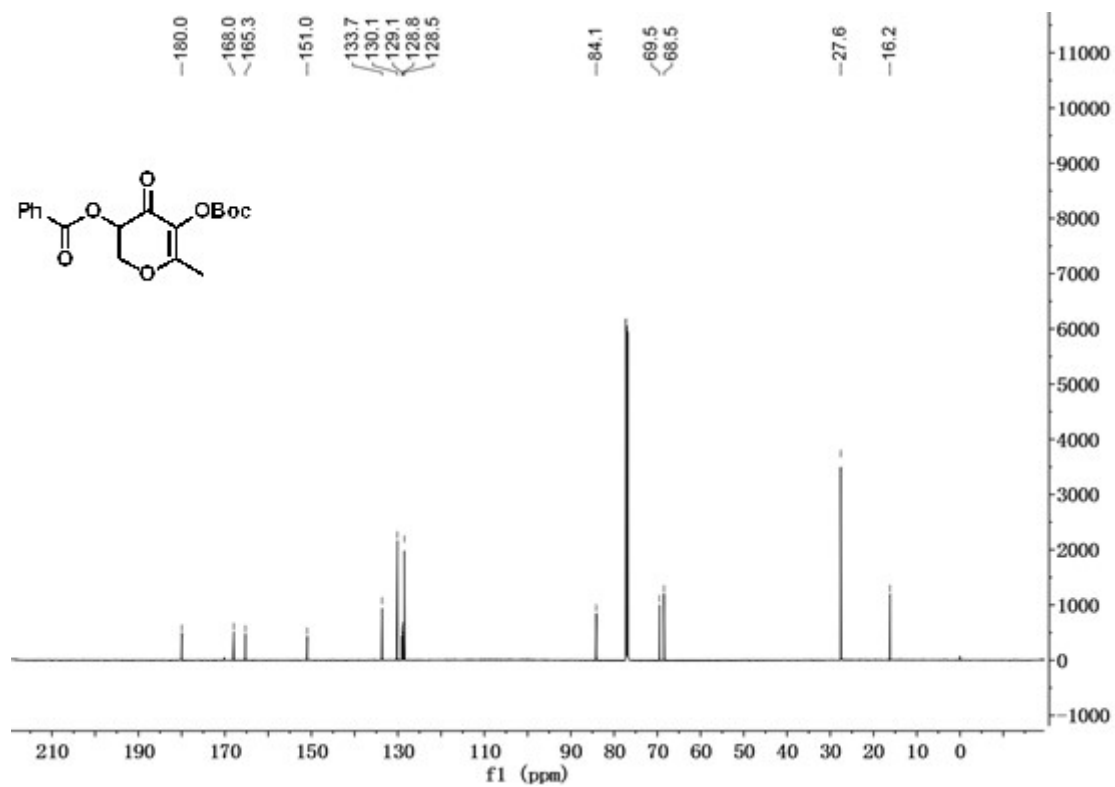

5-hydroxy-6-methyl-4-oxo-3,4-dihydro-2H-pyran-3-yl acetate (5a)

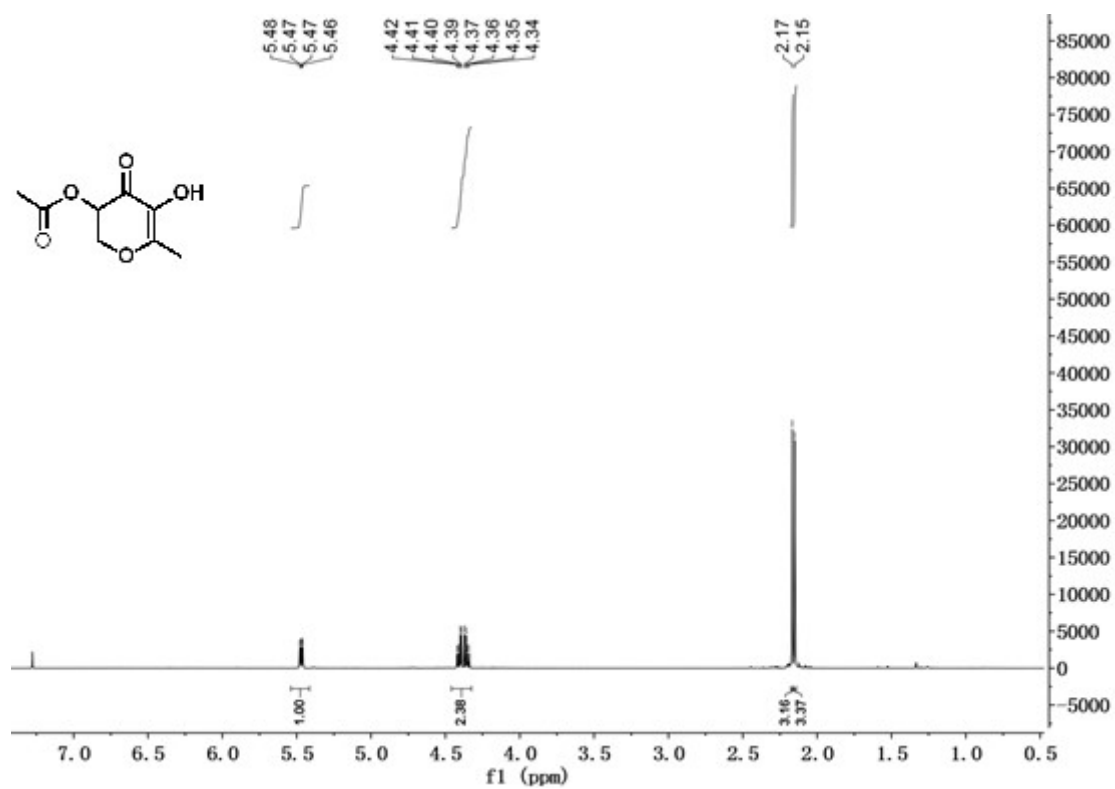

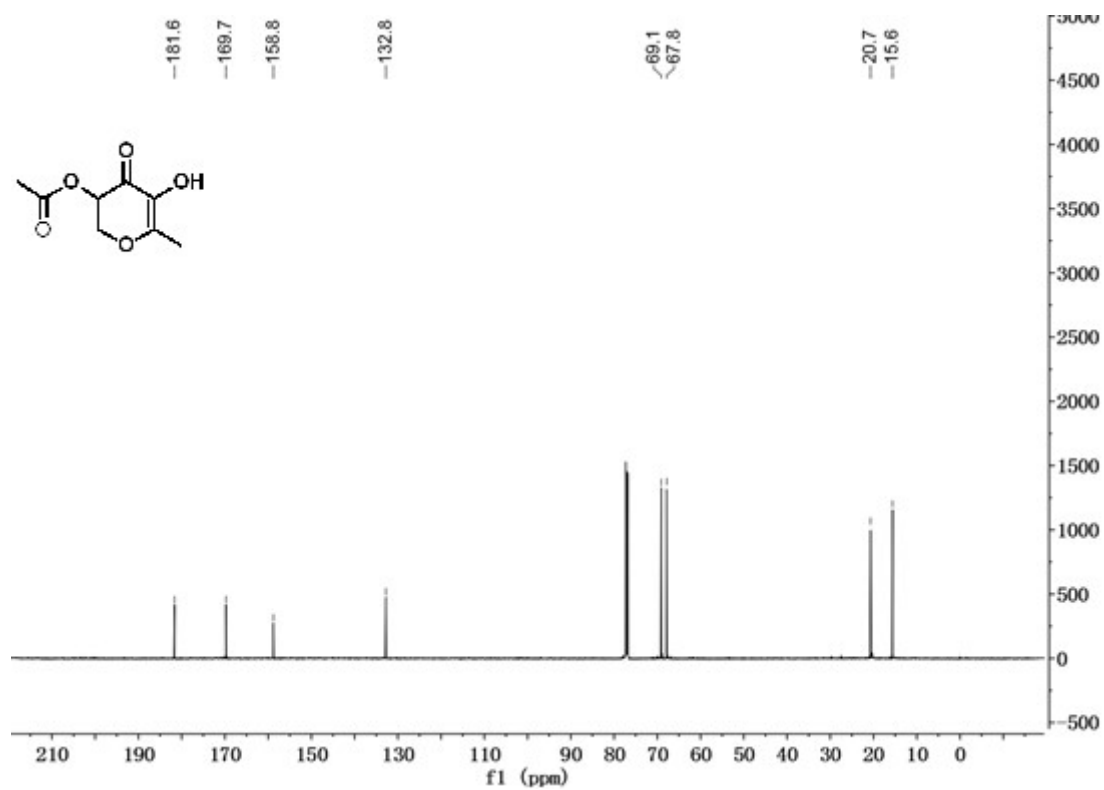

5-hydroxy-6-methyl-4-oxo-3,4-dihydro-2H-pyran-3-yl benzoate (5b)

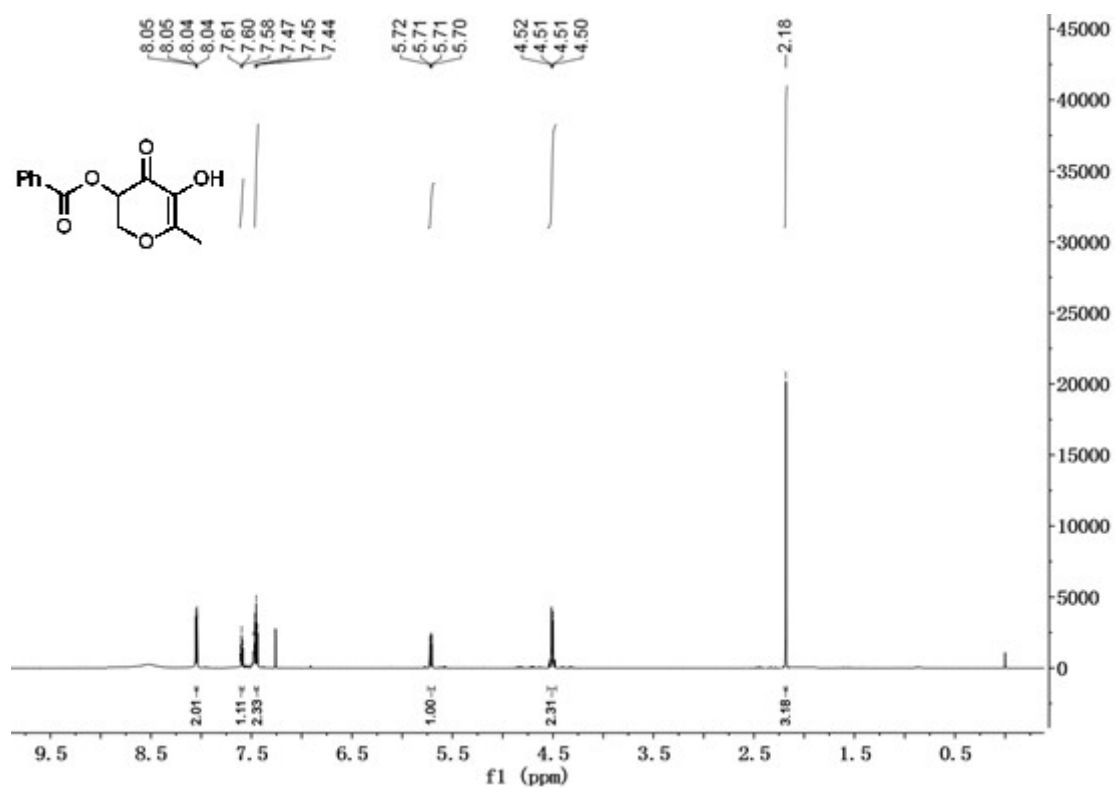

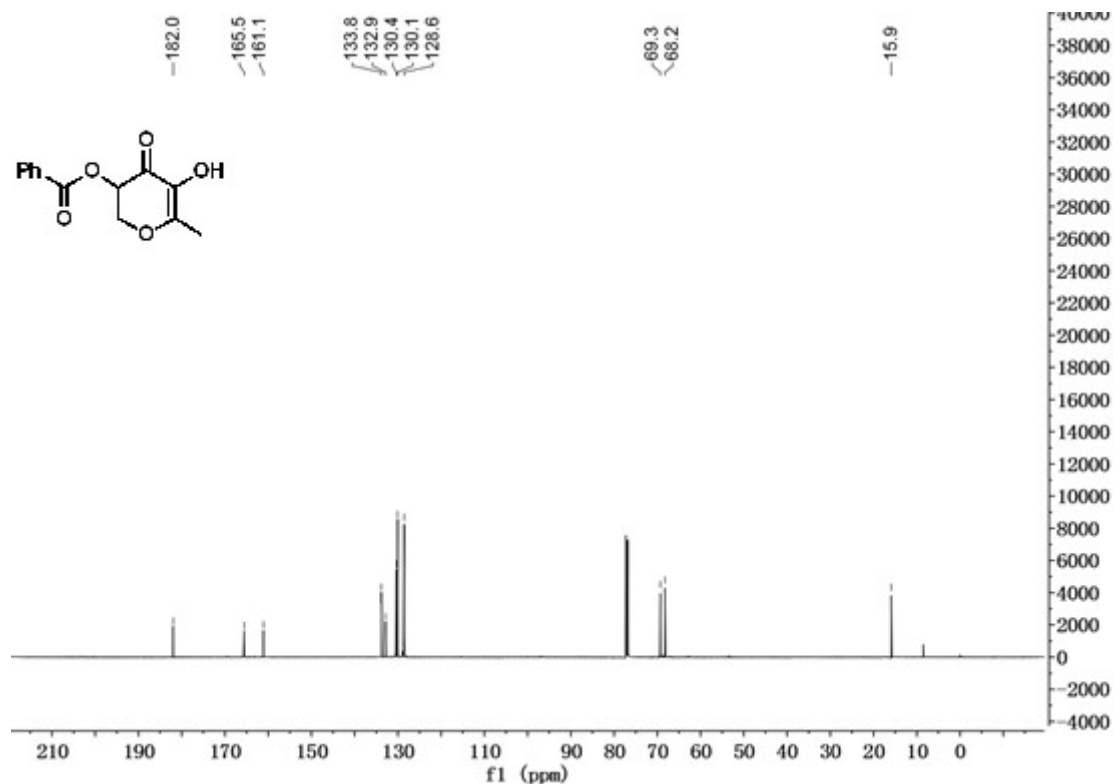

#### Reaction of DDMP with DPPH.

When the ratio of DDMP to DPPH was 1:2, DDMP was almost completely consumed. Several carbon signals at chemical shift  $\delta$ 206~197 and  $\delta$ 174~168 on the  $^{13}\text{C}$  NMR spectrum were found.

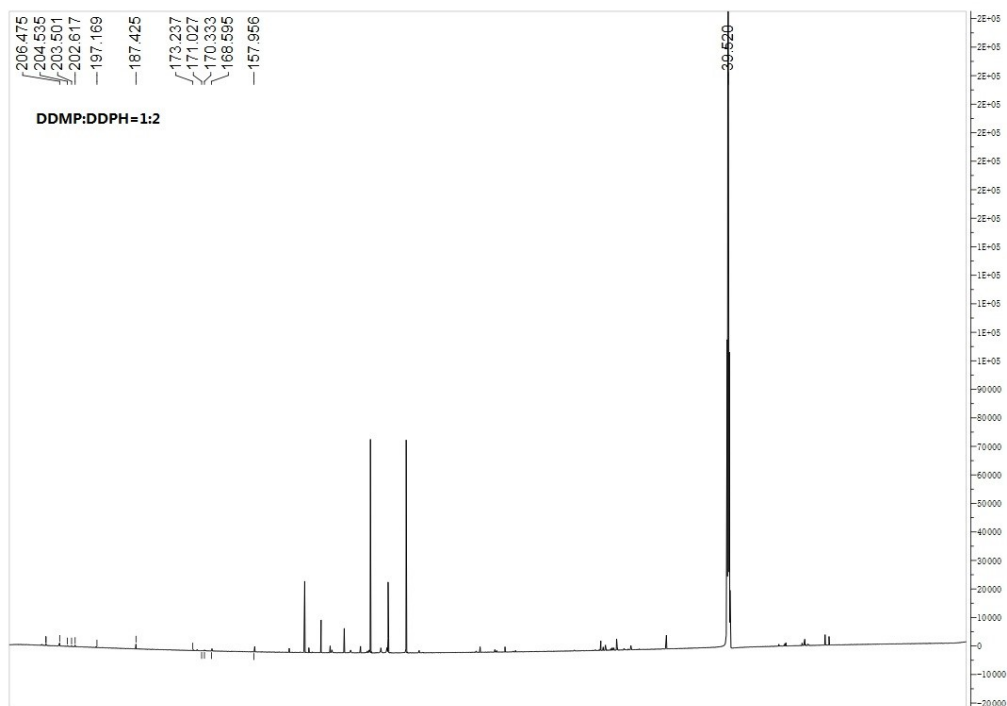

#### 4. Results of scavenging radicals.

**Table 1S** Equation of  $[\text{ABTS}^{+\bullet}] \sim t$  and its differential style ( $-d[\text{ABTS}^{+\bullet}]/dt \sim t$ ), reaction rate at  $t = 0$  ( $r_0$ ), and rate constant ( $k$ ) <sup>a</sup>.

| Compound  | Equation of $[\text{ABTS}^{+\bullet}] (\mu\text{M}) \sim t (\text{s})$                     | Equation of $-d[\text{ABTS}^{+\bullet}]/dt \sim t$                                            | $r_0$<br>( $\mu\text{M}\cdot\text{s}^{-1}$ ) | $k$<br>( $\text{mM}^{-1}\cdot\text{s}^{-1}$ ) |
|-----------|--------------------------------------------------------------------------------------------|-----------------------------------------------------------------------------------------------|----------------------------------------------|-----------------------------------------------|
| <b>1</b>  | $[\text{ABTS}^{+\bullet}] = 13.86e^{-\frac{t}{7.20}} + 19.53e^{-\frac{t}{256.00}} + 14.59$ | $-\frac{d[\text{ABTS}^{+\bullet}]}{dt} = 1.93e^{-\frac{t}{7.20}} + 0.08e^{-\frac{t}{256.00}}$ | 2.01                                         | 2.40                                          |
| <b>2a</b> | $[\text{ABTS}^{+\bullet}] = 7.81e^{-\frac{t}{3.95}} + 9.29e^{-\frac{t}{105.27}} + 30.53$   | $-\frac{d[\text{ABTS}^{+\bullet}]}{dt} = 1.98e^{-\frac{t}{3.95}} + 0.09e^{-\frac{t}{105.27}}$ | 2.07                                         | $6.19 \times 10^{-2}$                         |
| <b>2b</b> | $[\text{ABTS}^{+\bullet}] = 8.16e^{-\frac{t}{5.11}} + 7.69e^{-\frac{t}{114.76}} + 31.70$   | $-\frac{d[\text{ABTS}^{+\bullet}]}{dt} = 1.60e^{-\frac{t}{5.11}} + 0.07e^{-\frac{t}{114.76}}$ | 1.67                                         | $4.99 \times 10^{-2}$                         |
| <b>2c</b> | $[\text{ABTS}^{+\bullet}] = 5.91e^{-\frac{t}{4.11}} + 2.68e^{-\frac{t}{274.48}} + 39.05$   | $-\frac{d[\text{ABTS}^{+\bullet}]}{dt} = 1.44e^{-\frac{t}{4.11}} + 0.01e^{-\frac{t}{274.48}}$ | 1.45                                         | $4.34 \times 10^{-2}$                         |
| <b>2d</b> | $[\text{ABTS}^{+\bullet}] = 6.77e^{-\frac{t}{4.58}} + 3.78e^{-\frac{t}{114.33}} + 37.06$   | $-\frac{d[\text{ABTS}^{+\bullet}]}{dt} = 1.48e^{-\frac{t}{4.58}} + 0.03e^{-\frac{t}{114.33}}$ | 1.51                                         | $4.53 \times 10^{-2}$                         |
| <b>5a</b> | $[\text{ABTS}^{+\bullet}] = 8.33e^{-\frac{t}{8.36}} + 10.78e^{-\frac{t}{202.23}} + 28.17$  | $-\frac{d[\text{ABTS}^{+\bullet}]}{dt} = 1.00e^{-\frac{t}{8.36}} + 0.05e^{-\frac{t}{202.23}}$ | 1.05                                         | 1.26                                          |
| <b>5b</b> | $[\text{ABTS}^{+\bullet}] = 6.19e^{-\frac{t}{7.28}} + 8.82e^{-\frac{t}{254.51}} + 32.20$   | $-\frac{d[\text{ABTS}^{+\bullet}]}{dt} = 0.85e^{-\frac{t}{7.28}} + 0.03e^{-\frac{t}{254.51}}$ | 0.88                                         | 1.06                                          |
| <b>6</b>  | $[\text{ABTS}^{+\bullet}] = 7.41e^{-\frac{t}{4.72}} + 9.61e^{-\frac{t}{107.96}} + 30.62$   | $-\frac{d[\text{ABTS}^{+\bullet}]}{dt} = 1.57e^{-\frac{t}{4.72}} + 0.09e^{-\frac{t}{107.96}}$ | 1.66                                         | 1.99                                          |

<sup>a</sup> The concentrations of **1**, **5a**, **5b** and **6** were 17.5  $\mu\text{M}$ , the concentrations of **2a**, **2b**, **2c**, and **2d** were 700  $\mu\text{M}$ . The concentration of  $\text{ABTS}^{+\bullet}$  is 47.68  $\mu\text{M}$ .

**Table 2S** Equation of [DPPH]  $\sim t$  and its differential style ( $-d[\text{DPPH}]/dt \sim t$ ), reaction rate at  $t = 0$  ( $r_0$ ), and rate constant ( $k$ ) <sup>a</sup>.

| Compound  | Equation of [DPPH (μM)] $\sim t$ (s)                                              | Equation of $-d[\text{DPPH}]/dt \sim t$                                              | $r_0$<br>(μM·s <sup>-1</sup> ) | $k$<br>(mM <sup>-1</sup> ·s <sup>-1</sup> ) |
|-----------|-----------------------------------------------------------------------------------|--------------------------------------------------------------------------------------|--------------------------------|---------------------------------------------|
| <b>1</b>  | $[\text{DPPH}] = 65.86e^{-\frac{t}{2.76}} + 91.61e^{-\frac{t}{614.15}} + 141.88$  | $-\frac{d[\text{DPPH}]}{dt} = 23.86e^{-\frac{t}{2.76}} + 0.15e^{-\frac{t}{614.45}}$  | 24.01                          | 1.15                                        |
| <b>2a</b> | $[\text{DPPH}] = 64.34e^{-\frac{t}{1.34}} + 37.82e^{-\frac{t}{1500.28}} + 197.34$ | $-\frac{d[\text{DPPH}]}{dt} = 48.01e^{-\frac{t}{1.34}} + 0.03e^{-\frac{t}{1500.28}}$ | 48.04                          | 0.11                                        |
| <b>2b</b> | $[\text{DPPH}] = 66.51e^{-\frac{t}{1.60}} + 24.58e^{-\frac{t}{1216.64}} + 208.41$ | $-\frac{d[\text{DPPH}]}{dt} = 41.57e^{-\frac{t}{1.60}} + 0.02e^{-\frac{t}{1216.64}}$ | 41.59                          | 0.10                                        |
| <b>2c</b> | $[\text{DPPH}] = 61.95e^{-\frac{t}{1.22}} + 13.00e^{-\frac{t}{1200.09}} + 224.56$ | $-\frac{d[\text{DPPH}]}{dt} = 50.78e^{-\frac{t}{1.22}} + 0.01e^{-\frac{t}{1200.09}}$ | 50.79                          | 0.12                                        |
| <b>2d</b> | $[\text{DPPH}] = 61.68e^{-\frac{t}{1.24}} + 28.13e^{-\frac{t}{1228.93}} + 209.70$ | $-\frac{d[\text{DPPH}]}{dt} = 49.74e^{-\frac{t}{1.24}} + 0.02e^{-\frac{t}{1228.93}}$ | 49.76                          | 0.12                                        |
| <b>5a</b> | $[\text{DPPH}] = 27.56e^{-\frac{t}{1.43}} + 81.99e^{-\frac{t}{1914.14}} + 189.96$ | $-\frac{d[\text{DPPH}]}{dt} = 19.27e^{-\frac{t}{1.43}} + 0.04e^{-\frac{t}{1914.14}}$ | 19.31                          | 0.92                                        |
| <b>5b</b> | $[\text{DPPH}] = 22.27e^{-\frac{t}{1.11}} + 32.07e^{-\frac{t}{1610.58}} + 245.16$ | $-\frac{d[\text{DPPH}]}{dt} = 20.06e^{-\frac{t}{1.11}} + 0.02e^{-\frac{t}{1610.58}}$ | 20.08                          | 0.96                                        |
| <b>6</b>  | $[\text{DPPH}] = 31.65e^{-\frac{t}{1.51}} + 70.02e^{-\frac{t}{1244.20}} + 197.83$ | $-\frac{d[\text{DPPH}]}{dt} = 20.96e^{-\frac{t}{1.51}} + 0.06e^{-\frac{t}{1244.20}}$ | 21.02                          | 1.00                                        |

<sup>a</sup> The concentrations of **1**, **5a**, **5b**, and **6** were 70 μM, the concentration of **2a**, **2b**, **2c**, and **2d** were 1400 μM. The concentration of DPPH is 299.51 μM.

**Table 3S** Equation of [galvinoxyl]  $\sim t$  and its differential style ( $-d[\text{galvinoxyl}]/dt \sim t$ ), reaction rate at  $t = 0$  ( $r_0$ ), and rate constant ( $k$ ) <sup>a</sup>.

| Compound  | Equation of [galvinoxyl (μM)] $\sim t$ (s)                                          | Equation of $-d[\text{galvinoxyl}]/dt \sim t$                                               | $r_0$<br>(μM·s <sup>-1</sup> ) | $k$<br>(mM <sup>-1</sup> ·s <sup>-1</sup> ) |
|-----------|-------------------------------------------------------------------------------------|---------------------------------------------------------------------------------------------|--------------------------------|---------------------------------------------|
| <b>1</b>  | $[\text{galvinoxyl}] = 0.94e^{-\frac{t}{2.28}} + 8.64e^{-\frac{t}{469.40}} + 1.37$  | $-\frac{d[\text{galvinoxyl}]}{dt} = 0.41e^{-\frac{t}{2.28}} + 0.02e^{-\frac{t}{469.40}}$    | 0.43                           | 2.25                                        |
| <b>2a</b> | $[\text{galvinoxyl}] = 0.95e^{-\frac{t}{2.15}} + 1.89e^{-\frac{t}{1344.76}} + 6.80$ | $-\frac{d[\text{galvinoxyl}]}{dt} = 0.44e^{-\frac{t}{2.15}} + 0.001e^{-\frac{t}{1344.76}}$  | 0.44                           | 0.06                                        |
| <b>2b</b> | $[\text{galvinoxyl}] = 1.10e^{-\frac{t}{2.12}} + 2.21e^{-\frac{t}{1714.24}} + 6.42$ | $-\frac{d[\text{galvinoxyl}]}{dt} = 0.52e^{-\frac{t}{2.12}} + 0.001e^{-\frac{t}{1714.24}}$  | 0.52                           | 0.08                                        |
| <b>2c</b> | $[\text{galvinoxyl}] = 0.85e^{-\frac{t}{2.05}} + 1.47e^{-\frac{t}{2449.80}} + 7.32$ | $-\frac{d[\text{galvinoxyl}]}{dt} = 0.41e^{-\frac{t}{2.05}} + 0.001e^{-\frac{t}{2449.80}}$  | 0.41                           | 0.06                                        |
| <b>2d</b> | $[\text{galvinoxyl}] = 0.86e^{-\frac{t}{1.78}} + 3.11e^{-\frac{t}{3214.08}} + 5.67$ | $-\frac{d[\text{galvinoxyl}]}{dt} = 0.48e^{-\frac{t}{1.78}} + 0.001e^{-\frac{t}{3214.08}}$  | 0.48                           | 0.07                                        |
| <b>5a</b> | $[\text{galvinoxyl}] = 0.57e^{-\frac{t}{4.25}} + 4.23e^{-\frac{t}{1843.37}} + 6.15$ | $-\frac{d[\text{galvinoxyl}]}{dt} = 0.13e^{-\frac{t}{4.25}} + 0.002e^{-\frac{t}{1843.37}}$  | 0.14                           | 0.71                                        |
| <b>5b</b> | $[\text{galvinoxyl}] = 0.71e^{-\frac{t}{8.69}} + 1.50e^{-\frac{t}{1471.10}} + 8.73$ | $-\frac{d[\text{galvinoxyl}]}{dt} = 0.08e^{-\frac{t}{8.69}} + 0.001e^{-\frac{t}{1471.10}}$  | 0.08                           | 0.43                                        |
| <b>6</b>  | $[\text{galvinoxyl}] = 0.57e^{-\frac{t}{3.71}} + 5.07e^{-\frac{t}{1601.79}} + 5.31$ | $-\frac{d[\text{galvinoxyl}]}{dt} = 0.15e^{-\frac{t}{3.71}} + 0.0031e^{-\frac{t}{1601.79}}$ | 0.16                           | 0.82                                        |

<sup>a</sup> The concentrations of **1**, **5a**, **5b**, and **6** were 17.5 μM, the concentrations of **2a**, **2b**, **2c**, and **2d** was 700 μM. The concentration of galvinoxyl is 10.95 μM.
